# Supplementary material for: Avenue to X-ray-induced photodynamic therapy of prostatic carcinoma with octahedral molybdenum cluster nanoparticles
Source: Royal Society of Chemistry journal article supplement (doi:10.1039/d2tb00141a), 2022-01-01

## Electronic Supplementary Information

### **Avenue to X-ray-induced photodynamic therapy of prostatic carcinoma with octahedral molybdenum cluster nanoparticles**

Martina Koncošová,<sup>a</sup> Michaela Rumlová,<sup>b</sup> Romana Mikyšková,<sup>c</sup> Milan Reiniš,<sup>c</sup> Jaroslav Zelenka,<sup>a</sup> Tomáš Ruml,\*<sup>a</sup> Kaplan Kirakci\*<sup>d</sup> and Kamil Lang<sup>d</sup>

*<sup>a</sup>Department of Biochemistry and Microbiology, University of Chemistry and Technology Prague, Technická 5, 166 28 Praha 6, Czech Republic*

*<sup>b</sup>Department of Biotechnology, University of Chemistry and Technology Prague, Technická 5, 166 28 Praha 6, Czech Republic*

*<sup>c</sup>Institute of Molecular Genetics of the Czech Academy of Sciences, Videňská 1084, 142 20 Praha, Czech Republic*

*<sup>d</sup>Institute of Inorganic Chemistry of the Czech Academy of Sciences, Řež 1001, 250 68 Husinec-Řež, Czech Republic*

\* Corresponding authors:

Tomas.Ruml@vscht.cz (Tomáš Ruml)

kaplan@iic.cas.cz (Kaplan Kirakci)

## Content

**Figure S1.** Transmission electron micrographs of **1NPs**.

**Figure S2.** Powder XRD pattern of dried **1NPs**.

**Table S1.** Average size by number and zeta potential of **1NPs** in deionized water and PBS obtained by dynamic light scattering.

**Figure S3.** Size distributions by number of **1NPs** in deionized water and PBS obtained by dynamic light scattering.

**Figure S4.** Zeta potential distributions of **1NPs** in deionized water and PBS obtained by dynamic light scattering.

**Figure S5.** Normalized luminescence emission spectra of **1NPs** in argon-saturated PBS, fresh and after 3 days.

**Figure S6.** Phototoxicity of **1NPs** towards TRAMP-C2 cells, effects of treatment with lactic acid and pH 6.8.

**Table S2.** Blood count of mice treated with **1NPs**.

**Table S3.** Selected splenocytes populations of mice treated with **1NPs**.

**Table S4.** Concentration of Mo in selected tissue / material from control mice (not treated with **1NPs**) and mice injected subcutaneously with 200  $\mu\text{g}$  of **1NPs**.

**Figure S7.** Staining of tissue with **1NPs** after subcutaneous injection.

**Figure S1.** Transmission electron micrographs of **1NPs**.

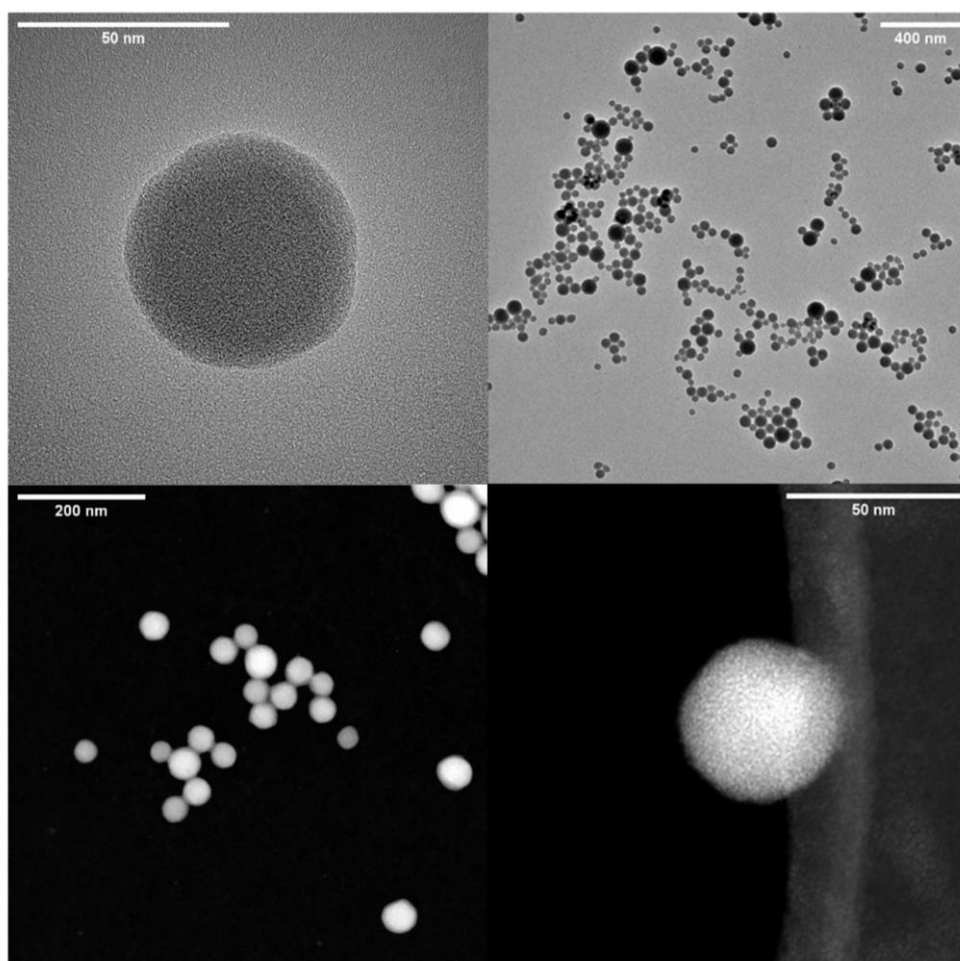

**Figure S2.** Powder XRD pattern in the transmission mode (Cu K $\alpha$ ) of dried **1NPs** deposited on a Mylar® foil.

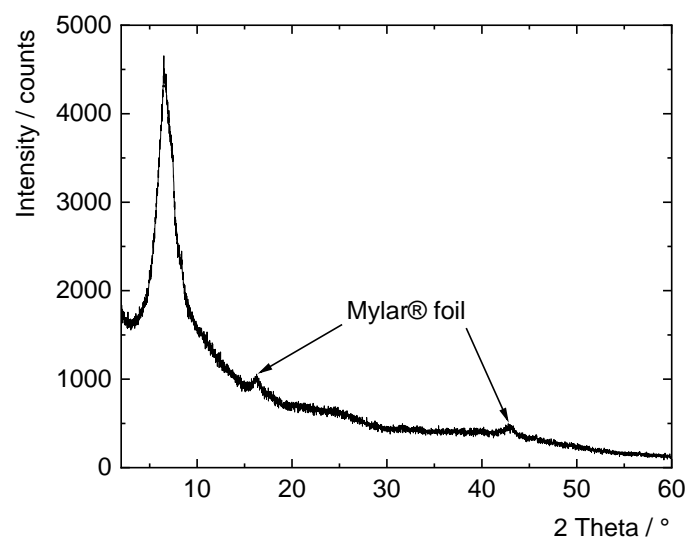

**Table S1.** Average size by number and zeta potential of **1NPs** in deionized water and PBS obtained by dynamic light scattering.

| Solvent         | Average size by number / nm | Dh / nm | PDI  | Zeta potential / mV |
|-----------------|-----------------------------|---------|------|---------------------|
| Deionized water | 55 ± 19 nm                  | 103     | 0.19 | -46 ± 13            |
| PBS             | 69 ± 16 nm (94 %)           | 343     | 0.40 | -35 ± 11            |
|                 | 269 ± 110 nm (6 %)          |         |      |                     |

**Figure S3.** Size distributions by number (left) and by intensity (right) of **1NPs** in deionized water (top) and PBS (bottom) obtained by dynamic light scattering.

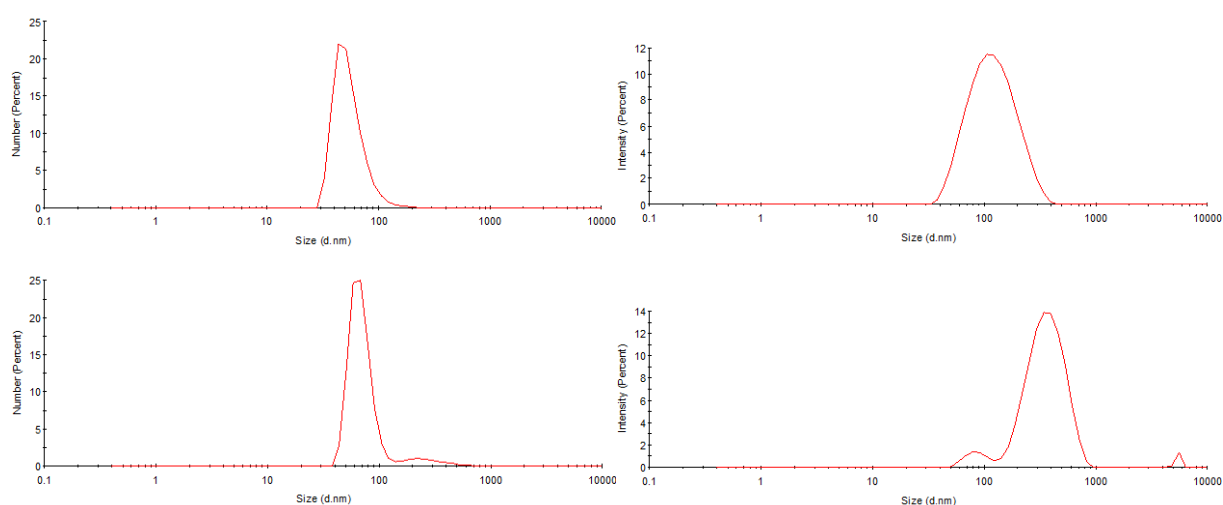

**Figure S4.** Zeta potential distributions of **1NPs** in deionized water (left) and PBS (right) obtained by dynamic light scattering.

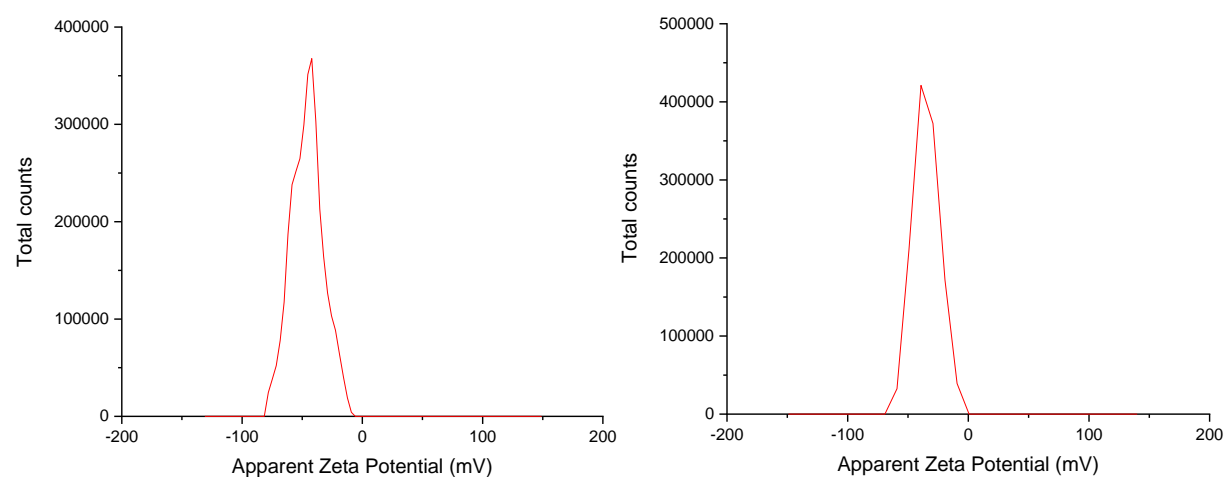

**Figure S5.** Normalized luminescence emission spectra of **1NPs** in argon-saturated PBS, fresh (black) and after 3 days (red).

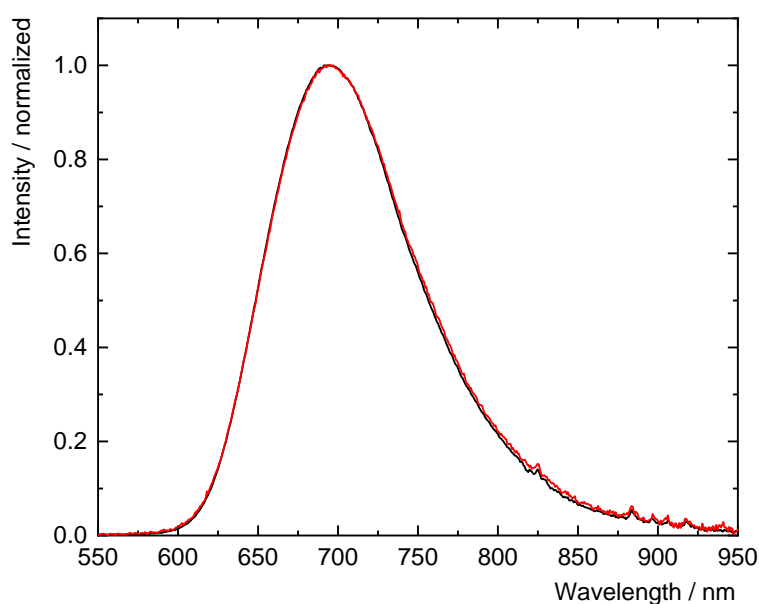

**Figure S6.** Phototoxicity of **1NPs** towards TRAMP-C2 cells: 4 h incubation with **1NPs**, then irradiation with 460 nm light (15 min, 9 mW cm<sup>-2</sup>), and measured after next 24 h with the resazurin assay. With exception of experiments under standard conditions, i.e., at pH 7.4 (C, black bars), cells were pretreated with 12 mM lactate (L), pH adjusted to 6.8 by the addition of HCl (A), or 12 mM lactate at pH 6.8 (LA) in the full medium for 48 h. Experiments were performed in (A) normoxia (20% O<sub>2</sub>) and (B) in hypoxia (5% O<sub>2</sub>). Significance was set at  $p < 0.05$  (\*  $p < 0.05$  compared to C, #  $p < 0.05$  when comparing A and LA).

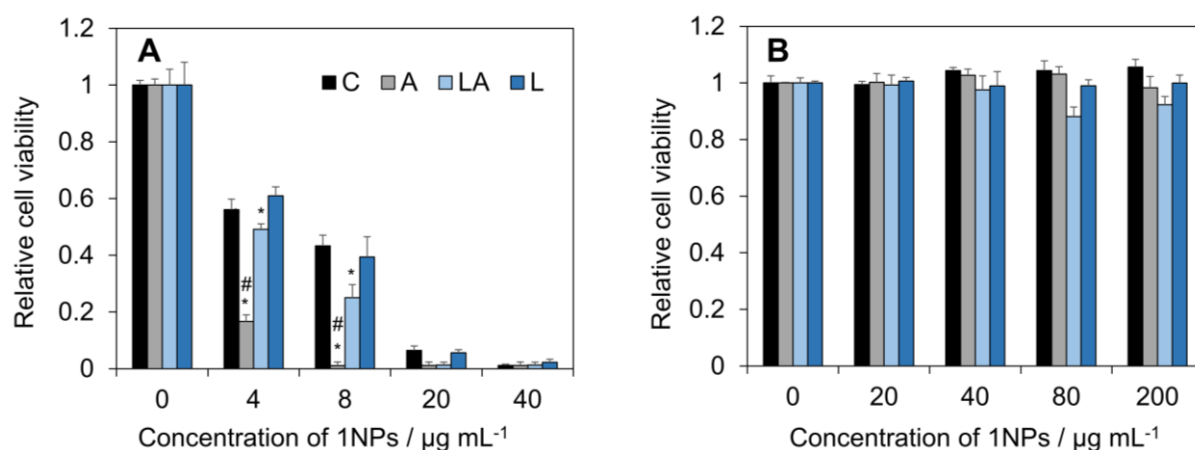

**Table S2.** Blood count of mice treated with **1NPs**. All but “Healthy mice” bear TRAMP-C2 tumors. Mice treated with **1NPs** received 200 µg.

|               | Control   | <b>1NPs</b> | Healthy   |
|---------------|-----------|-------------|-----------|
| <b>WBC</b>    | 14±4      | 10±3        | 10±1      |
| <b>Neu</b>    | 4±3       | 1.6±0.5     | 1.2±0.2   |
| <b>Lym</b>    | 9±3       | 8±3         | 8±1       |
| <b>Mon</b>    | 0.7±0.2   | 0.7±0.2     | 0.4±0.2   |
| <b>Eos</b>    | 0.2±0.1   | 0.2±0.1     | 0.5±0.3   |
| <b>Bas</b>    | 0.04±0.04 | 0.01±0.02   | 0.03±0.04 |
| <b>RBC</b>    | 11±1      | 10.3±0.6    | 10.7±0.8  |
| <b>HGB</b>    | 163±16    | 156±8       | 162±10    |
| <b>HCT</b>    | 0.57±0.05 | 0.54±0.03   | 0.54±0.04 |
| <b>MCV</b>    | 52.6±0.5  | 52.3±0.5    | 50.0±0.3  |
| <b>MCH</b>    | 15.2±0.2  | 15.1±0.2    | 15.2±0.2  |
| <b>MCHC</b>   | 288±1     | 289±2       | 304±4     |
| <b>RDW-CV</b> | 0.14±0.01 | 0.14±0.01   | 0.13±0.01 |
| <b>RDW-SD</b> | 30±2      | 30±2        | 27±1      |
| <b>PLT</b>    | 970±170   | 900±330     | 770±230   |
| <b>MPV</b>    | 5.4±0.1   | 5.5±0.2     | 5.5±0.1   |
| <b>PDW</b>    | 14.7±0.1  | 14.7±0.2    | 14.8±0.1  |
| <b>PCT</b>    | 5±1       | 5±2         | 4±1       |

Abbreviation: WBC (white blood cells), Neu (neutrophils), Lym (lymphocytes), Mon (monocytes), Eos (eosinophils), Bas (basophils), RBC (red blood cells), HGB (hemoglobin), HCT (hematocrit), MCV (mean corpuscular volume), MCH (mean corpuscular hemoglobin), MCHC (mean corpuscular hemoglobin concentration), RDW-CV / RDW-SD (red blood cell distribution width), PLT (platelets), MPV (mean platelet volume), PDW (platelet distribution width), PCT (procalcitonin).

**Table S3.** Selected splenocytes populations of mice treated with **1NPs** (percentages of the CD45-positive cells are given). Analyzed by flow cytometry for percentage of important selected immune cell populations: CD45, CD4, CD8, Gr-1+/CD11b+ and activated CD8+ immune cells (CD69+). All but “Healthy mice” bear TRAMP-C2 tumors. Mice treated with **1NPs** received 200 µg.

|                                           | Control | <b>1NPs</b> | Healthy |
|-------------------------------------------|---------|-------------|---------|
| <b>CD4<sup>+</sup></b>                    | 15±1    | 19±2        | 23±6    |
| <b>CD8<sup>+</sup></b>                    | 9±2     | 11±2        | 10±2    |
| <b>Gr-1<sup>+</sup>/CD11b<sup>+</sup></b> | 5±4     | 1.4±0.7     | 0.7±0.3 |
| <b>CD69<sup>+</sup></b>                   | 6±2     | 3±2         | 3.1±0.5 |

**Table S4.** Concentration of Mo (µg g<sup>-1</sup> of wet weight) in selected tissue / material from control mice (not treated with **1NPs**) and mice injected subcutaneously with 200 µg of **1NPs**.

|                    | Control   | 4 h after <b>1NPs</b><br>injection | 3 weeks after <b>1NPs</b><br>injection |
|--------------------|-----------|------------------------------------|----------------------------------------|
| <b>Entry</b>       | 0.10±0.01 | 350±130*                           | 7.7±4.0*                               |
| <b>Kidney</b>      | 0.50±0.01 | 0.4±0.2                            | 0.50±0.02                              |
| <b>Urine</b>       | 1.9±1.0   | 1.5±0.6                            | 0.6±0.5                                |
| <b>Lung</b>        | 0.10±0.01 | 0.10±0.02                          | 0.20±0.02                              |
| <b>Liver</b>       | 1.10±0.08 | 1.30±0.07*                         | 1.80±0.08*                             |
| <b>Gallbladder</b> | 1.00±0.03 | 1.20±0.02*                         | 1.30±0.06*                             |
| <b>Stool</b>       | 0.9±0.2   | 1.9±0.5*                           | 1.9±0.4*                               |
| <b>Feed</b>        | 1.90±0.03 | -                                  | -                                      |

\*Statistically different from the control group (p < 0.05).

**Figure S7.** Staining of tissue with 1NPs after subcutaneous injection (red arrow).

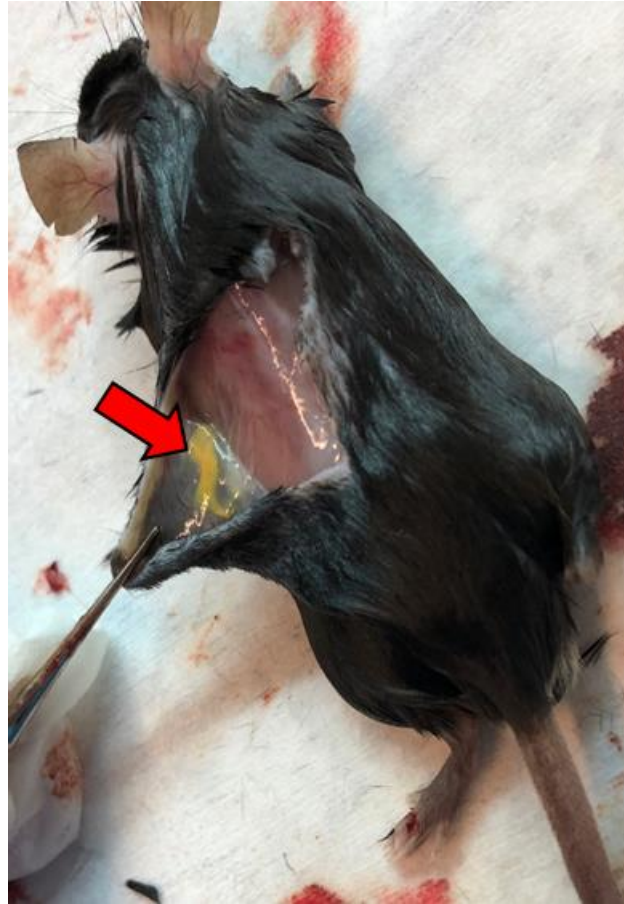

Supplement: d2tb00141a1.pdf [file d2tb00141a1.pdf]
